# Supplementary material for: Warming drove the expansion of marine anoxia in the equatorial Atlantic during the Cenomanian leading up to Oceanic Anoxic Event 2
Source: Copernicus journal article supplement (doi:10.5194/cp-19-2569-2023), 2023-12-20
Supplement: Supplementary file 1 [file cp-19-2569-2023-supplement.pdf]

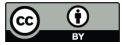

*Supplement of*

**Warming drove the expansion of marine anoxia in the equatorial Atlantic during the Cenomanian leading up to Oceanic Anoxic Event 2**

**Mohd Al Farid Abraham et al.**

*Correspondence to:* Mohd Al Farid Abraham (al.farid@ums.edu.my)

The copyright of individual parts of the supplement might differ from the article licence.

# Supplementary Information

## 1. Biomarker data from ODP Leg 207 Site 1258

**Table S1: Biomarker results from ODP Leg 207 Site 1258. The age model is reconstructed following the age-depth model Friedrich et al. (2008). The biomarkers shown are plotted in Figure 3, which represent the organic proxies for water column anoxia and euxinia.**

| Leg | Site | Hole | Core | Section | Top | Bottom | Age (Ma) | MBSF   | MCD    | TOC (%) | TEX86 | SST<br>(BAYSPAR) | $\frac{C_{28} \text{ 28,30-dinorhopane}}{(C_{27}-C_{35}) \text{ Hopanes (\%)}}$ | $\frac{(C_{35} \text{ } n\text{-alkane} + \text{ lycopane})}{C_{31} \text{ } n\text{-alkane}}$ | $C_{35}$<br>Hopanoid<br>Thiopene<br>( $\mu\text{g/g}$ ) | Isorenieratane<br>( $\mu\text{g/g}$ ) |
|-----|------|------|------|---------|-----|--------|----------|--------|--------|---------|-------|------------------|---------------------------------------------------------------------------------|------------------------------------------------------------------------------------------------|---------------------------------------------------------|---------------------------------------|
| 207 | 1258 | B    | 45   | 3       | 44  | 46     | 93.23    | 399.79 | 420.62 | 13.0    |       |                  | 3.2                                                                             | 2.9                                                                                            | 0.4                                                     | 0.0                                   |
| 207 | 1258 | B    | 45   | 3       | 65  | 67     | 93.27    | 400.00 | 420.83 | 10.6    | 0.9   | 38.8             | 1.8                                                                             | 2.6                                                                                            | 0.3                                                     | 0.0                                   |
| 207 | 1258 | B    | 45   | 4       | 117 | 118    | 93.53    | 401.93 | 422.76 | 16.2    | 0.9   | 40.6             | 6.1                                                                             | 1.1                                                                                            | 0.4                                                     | 0.0                                   |
| 207 | 1258 | B    | 45   | 4       | 126 | 128    | 93.53    | 402.02 | 422.85 | 22.4    | 0.9   | 39.4             | 2.8                                                                             | 1.4                                                                                            | 0.6                                                     | 0.0                                   |
| 207 | 1258 | B    | 45   | 4       | 130 | 132    | 93.54    | 402.06 | 422.89 | 26.2    | 0.8   | 35.7             | 2.7                                                                             | 1.7                                                                                            | 0.7                                                     | 0.0                                   |
| 207 | 1258 | B    | 45   | 4       | 138 | 139    | 93.55    | 402.14 | 422.97 | 18.1    | 0.9   | 40.0             | 1.6                                                                             | 1.8                                                                                            | 0.8                                                     | 0.2                                   |
| 207 | 1258 | B    | 45   | 4       | 141 | 143    | 93.55    | 402.17 | 423.00 | 19.7    | 0.9   | 40.0             | 1.8                                                                             | 1.3                                                                                            | 1.2                                                     | 0.2                                   |
| 207 | 1258 | B    | 46   | 2       | 36  | 38     | 93.82    | 404.10 | 426.16 | 8.0     | 0.9   | 40.1             | 8.2                                                                             | 11                                                                                             | 0.2                                                     | 0.0                                   |
| 207 | 1258 | B    | 46   | 2       | 78  | 80     | 93.85    | 404.52 | 426.58 | 12.7    | 0.9   | 37.0             | 9.5                                                                             | 13                                                                                             | 0.0                                                     | 0.0                                   |
| 207 | 1258 | B    | 46   | 2       | 96  | 98     | 93.87    | 404.70 | 426.76 | 11.8    | 0.9   | 41.2             | 2.0                                                                             | 12                                                                                             | 0.3                                                     | 0.0                                   |
| 207 | 1258 | B    | 46   | 2       | 100 | 102    | 93.87    | 404.74 | 426.80 | 6.1     | 0.9   | 36.3             | 2.5                                                                             | 1.9                                                                                            | 0.1                                                     | 0.0                                   |
| 207 | 1258 | B    | 46   | 2       | 106 | 108    | 93.88    | 404.80 | 426.86 | 17.0    | 0.9   | 38.7             | 14                                                                              | 33                                                                                             | 0.1                                                     | 0.0                                   |
| 207 | 1258 | B    | 46   | 2       | 114 | 116    | 93.88    | 404.88 | 426.94 | 8.5     | 0.9   | 39.4             | 13                                                                              | 32                                                                                             | 0.1                                                     | 0.0                                   |
| 207 | 1258 | B    | 46   | 2       | 120 | 122    | 93.89    | 404.94 | 427.00 | 7.0     | 1.0   | 43.1             | 13                                                                              | 19                                                                                             | 0.1                                                     | 0.0                                   |
| 207 | 1258 | B    | 46   | 2       | 126 | 128    | 93.89    | 405.00 | 427.06 | 10.2    | 0.9   | 39.4             | 12                                                                              | 5                                                                                              | 0.1                                                     | 0.0                                   |

|     |      |   |    |   |     |     |       |        |        |      |     |      |     |     |     |     |
|-----|------|---|----|---|-----|-----|-------|--------|--------|------|-----|------|-----|-----|-----|-----|
| 207 | 1258 | B | 46 | 2 | 134 | 136 | 93.90 | 405.08 | 427.14 | 2.4  | 0.9 | 40.0 | 10  | 3.1 | 0.0 | 0.0 |
| 207 | 1258 | B | 46 | 3 | 78  | 80  | 93.98 | 406.01 | 428.07 | 8.3  | 0.9 | 36.9 | 3.3 | 1.6 | 0.3 | 0.0 |
| 207 | 1258 | B | 46 | 4 | 18  | 19  | 94.01 | 406.40 | 428.46 | 9.3  | 0.8 | 35.7 | 4.3 | 1.6 | 0.5 | 0.0 |
| 207 | 1258 | B | 46 | 4 | 64  | 65  | 94.05 | 406.86 | 428.92 | 15.0 | 0.9 | 37.5 | 1.8 | 1.5 | 0.4 | 0.0 |
| 207 | 1258 | B | 46 | 4 | 104 | 105 | 94.08 | 407.26 | 429.32 | 10.3 | 0.9 | 37.6 | 4.8 | 5.8 | 0.2 | 0.0 |
| 207 | 1258 | B | 47 | 1 | 52  | 53  | 94.12 | 407.62 | 429.68 | 10.8 | 0.9 | 39.4 | 2.7 | 2   | 0.0 | 0.0 |
| 207 | 1258 | B | 47 | 1 | 94  | 96  | 94.15 | 408.04 | 430.10 | 3.6  | 0.9 | 36.9 | 4.7 | 1.6 | 0.4 | 0.0 |
| 207 | 1258 | B | 47 | 3 | 73  | 74  | 94.22 | 409.02 | 431.08 | 8.2  | 0.9 | 36.3 | 5.7 | 5.5 | 0.3 | 0.0 |
| 207 | 1258 | B | 47 | 4 | 37  | 38  | 94.29 | 409.97 | 432.03 | 2.6  | 0.9 | 38.8 | 24  | 51  | 0.2 | 0.0 |
| 207 | 1258 | B | 47 | 4 | 99  | 100 | 94.44 | 412.03 | 434.09 | 9.3  | 0.9 | 36.9 | 30  | 51  | 0.3 | 0.0 |
| 207 | 1258 | B | 48 | 1 | 32  | 33  | 94.52 | 413.02 | 435.08 | 0.4  | 0.9 | 38.1 | 5.3 | 3.6 | 0.0 | 0.0 |
| 207 | 1258 | B | 48 | 1 | 108 | 109 | 94.58 | 413.78 | 435.84 | 9.0  | 0.9 | 36.3 | 3.1 | 1.6 | 0.3 | 0.0 |
| 207 | 1258 | B | 48 | 2 | 19  | 21  | 94.61 | 414.32 | 436.38 | 4.6  | 0.8 | 35.7 | 4.7 | 7.5 | 0.3 | 0.0 |
| 207 | 1258 | B | 49 | 1 | 9   | 11  | 94.80 | 416.79 | 438.85 | 5.8  | 0.8 | 35.7 | 20  | 39  | 0.2 | 0.0 |
| 207 | 1258 | B | 49 | 1 | 33  | 35  | 94.82 | 417.03 | 439.09 | 9.3  | 0.8 | 35.1 | 4.9 | 23  | 0.0 | 0.0 |
| 207 | 1258 | B | 49 | 1 | 69  | 71  | 94.85 | 417.39 | 439.45 | 8.9  | 0.8 | 32.6 | 2.9 | 6.6 | 0.0 | 0.0 |
| 207 | 1258 | B | 49 | 1 | 92  | 94  | 94.86 | 417.62 | 439.68 | 4.4  | 0.8 | 32.7 | 5.1 | 12  | 0.2 | 0.0 |
| 207 | 1258 | B | 49 | 1 | 100 | 102 | 94.87 | 417.70 | 439.76 | 8.0  | 0.8 | 33.3 | 5.7 | 2.2 | 0.0 | 0.0 |
| 207 | 1258 | B | 49 | 1 | 133 | 135 | 94.89 | 418.03 | 440.09 | 7.8  | 0.8 | 33.9 | 3.7 | 2.2 | 0.0 | 0.0 |
| 207 | 1258 | B | 49 | 2 | 6   | 8   | 94.91 | 418.26 | 440.32 | 4.0  | 0.9 | 37.0 | 9.2 | 40  | 0.2 | 0.0 |
| 207 | 1258 | B | 49 | 2 | 61  | 63  | 94.95 | 418.81 | 440.87 | 8.0  | 0.8 | 33.9 | 5.7 | 1.9 | 0.3 | 0.0 |
| 207 | 1258 | B | 49 | 2 | 81  | 83  | 94.96 | 419.01 | 441.07 | 7.7  | 0.8 | 33.3 | 2.4 | 2.1 | 0.0 | 0.0 |
| 207 | 1258 | B | 49 | 2 | 96  | 98  | 94.98 | 419.16 | 441.22 | 9.7  | 0.8 | 33.9 | 2.5 | 2.3 | 0.3 | 0.0 |
| 207 | 1258 | B | 49 | 3 | 28  | 30  | 95.01 | 419.65 | 441.71 | 9.9  | 0.8 | 34.5 | 6   | 15  | 0.0 | 0.0 |
| 207 | 1258 | B | 49 | 3 | 43  | 45  | 95.02 | 419.80 | 441.86 | 9.1  | 0.8 | 31.4 | 8.9 | 29  | 0.5 | 0.0 |
| 207 | 1258 | B | 49 | 4 | 13  | 15  | 95.05 | 420.09 | 442.15 | 1.7  | 0.8 | 35.1 | 4   | 3.5 | 0.3 | 0.0 |
| 207 | 1258 | B | 50 | 1 | 4   | 6   | 95.15 | 422.34 | 443.52 | 3.9  | 0.8 | 35.1 | 11  | 59  | 0.0 | 0.0 |
| 207 | 1258 | B | 50 | 1 | 29  | 31  | 95.16 | 422.59 | 443.77 | 5.8  | 0.8 | 33.2 | 12  | 19  | 0.0 | 0.0 |

|     |      |   |    |   |     |     |       |        |        |      |     |      |     |     |     |     |
|-----|------|---|----|---|-----|-----|-------|--------|--------|------|-----|------|-----|-----|-----|-----|
| 207 | 1258 | B | 50 | 1 | 44  | 46  | 95.17 | 422.74 | 443.92 | 5.4  | 0.8 | 33.9 | 35  | 65  | 0.3 | 0.0 |
| 207 | 1258 | B | 50 | 1 | 64  | 66  | 95.19 | 422.94 | 444.12 | 9.4  | 0.8 | 33.8 | 7   | 25  | 0.0 | 0.0 |
| 207 | 1258 | B | 50 | 1 | 74  | 76  | 95.20 | 423.04 | 444.22 | 2.9  | 0.8 | 35.1 | 25  | 71  | 0.0 | 0.0 |
| 207 | 1258 | B | 50 | 2 | 6   | 8   | 95.26 | 423.80 | 444.98 | 5.3  | 0.8 | 35.7 | 6.2 | 3.5 | 0.1 | 0.0 |
| 207 | 1258 | B | 50 | 2 | 55  | 57  | 95.30 | 424.29 | 445.47 | 6.6  | 0.8 | 34.5 | 5.2 | 11  | 0.0 | 0.0 |
| 207 | 1258 | B | 50 | 3 | 13  | 15  | 95.35 | 425.10 | 446.28 | 4.5  | 0.9 | 37.0 | 18  | 20  | 0.0 | 0.0 |
| 207 | 1258 | B | 50 | 3 | 55  | 57  | 95.39 | 425.52 | 446.70 | 7.9  | 0.8 | 33.9 | 2.5 | 2.6 | 0.0 | 0.0 |
| 207 | 1258 | B | 51 | 1 | 14  | 16  | 95.69 | 426.44 | 450.76 | 2.8  | 0.9 | 38.2 | 19  | 8.1 | 0.0 | 0.0 |
| 207 | 1258 | B | 51 | 1 | 61  | 63  | 95.73 | 426.91 | 451.23 | 7.4  | 0.8 | 32.0 | 6.8 | 6.4 | 0.0 | 0.0 |
| 207 | 1258 | B | 51 | 1 | 87  | 89  | 95.74 | 427.17 | 451.49 | 10.3 |     |      | 1.8 | 2   | 0.2 | 0.0 |
| 207 | 1258 | B | 51 | 2 | 31  | 33  | 95.81 | 428.03 | 452.35 | 2.8  | 0.8 | 32.7 | 1.9 | 1.4 | 0.0 | 0.0 |
| 207 | 1258 | B | 51 | 2 | 117 | 119 | 95.87 | 428.89 | 453.21 | 7.8  | 0.8 | 33.3 | 1.7 | 0.6 | 0.0 | 0.0 |
| 207 | 1258 | B | 51 | 3 | 16  | 18  | 95.89 | 429.12 | 453.44 | 3.7  | 0.8 | 32.7 | 3.5 | 0.8 | 0.0 | 0.0 |
| 207 | 1258 | B | 51 | 3 | 70  | 72  | 95.93 | 429.66 | 453.98 | 7.6  | 0.8 | 33.3 | 2.5 | 1.3 | 0.0 | 0.0 |
| 207 | 1258 | B | 52 | 1 | 61  | 63  | 96.14 | 432.51 | 456.83 | 2.4  | 0.8 | 32.7 | 4.2 | 2   | 0.0 | 0.0 |
| 207 | 1258 | B | 52 | 2 | 28  | 30  | 96.20 | 433.29 | 457.61 | 3.3  | 0.8 | 33.9 | 3.4 | 1.5 | 0.0 | 0.0 |
| 207 | 1258 | B | 52 | 3 | 69  | 71  | 96.31 | 434.70 | 459.02 | 4.3  | 0.8 | 34.5 | 23  | 19  | 0.0 | 0.0 |
| 207 | 1258 | B | 52 | 4 | 12  | 14  | 96.34 | 435.17 | 459.49 | 7.6  | 0.8 | 33.3 | 2.8 | 2.7 | 0.0 | 0.0 |
| 207 | 1258 | B | 53 | 1 | 28  | 30  | 96.44 | 436.18 | 460.82 | 12.7 | 0.8 | 33.9 | 1.2 | 2.1 | 0.0 | 0.0 |
| 207 | 1258 | B | 53 | 2 | 40  | 42  | 96.54 | 437.50 | 462.14 | 3.5  | 0.8 | 34.5 | 2.4 | 1.7 | 0.0 | 0.0 |
| 207 | 1258 | B | 53 | 3 | 22  | 24  | 96.64 | 438.82 | 463.46 | 5.9  | 0.8 | 34.5 | 2.8 | 2.2 | 0.0 | 0.0 |
| 207 | 1258 | B | 54 | 1 | 47  | 49  | 96.86 | 441.97 | 466.45 | 1.8  | 0.8 | 34.5 | 3.6 | 7.9 | 0.1 | 0.0 |
| 207 | 1258 | B | 54 | 1 | 87  | 89  | 96.89 | 442.37 | 466.85 | 5.9  | 0.7 | 35.7 | 2.8 | 7.6 | 0.2 | 0.0 |

## 2. Secondary influences on GDGT distribution during Cenomanian

**Table S2: Assessment on secondary influences on GDGTs distribution during Cenomanian**

| GDGT Indices  | Cut-off value | Cenomanian average value | Interpretation                                            |
|---------------|---------------|--------------------------|-----------------------------------------------------------|
| BIT Index     | > 0.3         | 0.1                      | No significance influence on terrestrial influx           |
| % GDGT-0      | > 67 %        | 16 %                     | No sedimentary GDGT produce by methanogenesis.            |
| Methane Index | > 0.5         | 0.2                      | No contribution of ammonia-oxidising archaea to GDGT pool |
| GDGT-2/GDGT-3 | > 5           | 2.2                      | GDGTs derived from shallow planktonic community.          |

## 3. Atmospheric carbon dioxide (pCO<sub>2</sub>) estimates from phytane $\delta^{13}\text{C}$

We use the  $\delta^{13}\text{C}$  values of the marine photoautotroph biomarker phytane to constrain the partial pressure of atmospheric carbon dioxide ( $p\text{CO}_2$ ). Briefly, this is determined following the approach used to develop phytane-derived  $p\text{CO}_2$  reconstructions for the Phanerozoic by Witkowski et al. (2018), adapted from previous work (i.e., Bidigare et al., 1997) and previous applications to the Cretaceous (Naafs et al., 2016; Sinninghe Damsté et al., 2008). We determine the isotope effect associated with  $\text{CO}_2$  fixation using Equation 1 as described by Freeman and Hayes (1992):

$$\varepsilon_p = 1000 \times \left[ \frac{(\delta_d + 1000)}{(\delta_p + 1000)} - 1 \right]$$

**Equation 1** Isotopic  $\text{CO}_2$  fractionation (Freeman and Hayes, 1992)

Where  $\varepsilon_p$  is overall isotopic fractionation,  $\delta_p$  is the  $\delta^{13}\text{C}$  primary photosynthate, and  $\delta_d$  is the  $\delta^{13}\text{C}$  of aqueous carbon dioxide ( $\text{CO}_{2(\text{aq})}$ ) in the photic zone. The  $\delta_p$  is determined using Equation 2:

$$\delta_p = \delta^{13}\text{C of phytane} + \Delta\delta$$

**Equation 2**  $\delta^{13}\text{C}$  of primary photosynthate (Freeman and Hayes, 1992)

Where  $\delta^{13}\text{C}$  of phytane is directly determined and  $\Delta\delta$  is assumed to be 3.5 ‰ ( $\sigma = 1.3$  ‰), based on the average of algal culture experiments that determined the offset between the  $\delta^{13}\text{C}$  of algal biomass and phytol (Witkowski et al., 2018).

The  $\delta_d$  is normally determined using equation (3):

$$\delta_d = \delta^{13}\text{C of planktonic foraminifera} - 1 + \varepsilon_{b(a)}$$

**Equation 3**  $\delta^{13}\text{C}$  of aqueous carbon dioxide (Freeman and Hayes, 1992)

Where  $\delta^{13}\text{C}$  planktonic foraminifera carbonate is measured and then adjusted for calcite-bicarbonate and bicarbonate- $\text{CO}_{2(\text{aq})}$  enrichment factors arising from abiotic kinetic fractionation (Romanek et al., 1992). Since the Demerara Rise sediments lack abundant, well-preserved planktonic foraminifera due to their deposition

within shoaling carbonate compensation depth (Bralower, 1988), this study applied an average value  $\delta^{13}\text{C}_{\text{carb}}$  of *Whiteinella baltica* (1 ‰), as reported by Bice and Norris (2005) for the Cenomanian. This is comparable to the long-term global average of  $\delta^{13}\text{C}$  for Cretaceous carbonate (1 ‰; Hayes et al., 1999). Similarly, to reconstruct  $\text{CO}_2$ , Bice et al. (2006) applied *Hedbergella delrioensis* (0.4 ‰) and *Whiteinella baltica* (0.88 ‰), while Sinninghe Damsté et al. (2008) used a *Hedbergella delrioensis* of 2 ‰ excursions for the OAE 2. Crucially, the assumption of a constant carbonate  $\delta^{13}\text{C}$  for the Cenomanian carbonate is likely incorrect, as previous records document a long-term change of about 1 ‰ across this period (Hayes et al., 1999), and that is explored in the discussion. The  $\varepsilon_{\text{b(a)}}$  term reflects carbon isotopic fractionation of ( $\text{CO}_2$  (aq)), the assumed substrate for algal photosynthesis, relative to bicarbonate; it is temperature dependant and calculated using equation (3):

$$\varepsilon_{\text{b(a)}} = 24.12 - \frac{9866}{\text{Temperature (K)}}$$

**Equation 3**  $\text{CO}_2$ (aq) isotopic fractionation with respect to  $\text{HCO}_3^-$  – and temperature dependent (Freeman and Hayes, 1992)

The temperature is based on our reconstructed  $\text{TEX}_{86}$ -based sea surface temperature (Figure 3C) that is calibrated using BAYSPAR (Tierney and Tingley, 2014) and converted into Kelvin.

To estimate  $\text{CO}_2$  (aq) from  $\varepsilon_{\text{p}}$ , we use equation (4) from Bidigare et al. (1997):

$$\text{CO}_2(\text{aq}) = \frac{b}{\varepsilon_{\text{f}} - \varepsilon_{\text{p}}}$$

**Equation 4** Dissolved  $\text{CO}_2$  from photosynthetic isotopic fractionation (Bidigare et al., 1997)

This equation assumes that  $\text{CO}_2$  enters the cell and arrives at the photosynthetic site only via diffusion (i.e. with no carbon concentrating mechanisms (Reinfelder, 2011)). Term  $b$  comprises physiological factors that influence isotopic fractionation (e.g., growth rate and cell geometry), and we estimate it to be  $170 \text{ ‰ kg } \mu\text{M}^{-1}$ , consistent with the previous phytane-based  $\text{CO}_2$  reconstructions (Sinninghe Damsté et al., 2008; Witkowski et al., 2018); however, this ignores potential changes in growth rate and cell geometry. The  $\varepsilon_{\text{f}}$  value is the maximum fractionation associated with the photosynthetic fixation of carbon and is assumed to be 26.5 ‰ (Witkowski et al., 2018 and references therein).

Finally, the conversion of  $\text{CO}_2$  (aq) from equation (4) to  $p\text{CO}_2$  is done using Henry's Law equation (5), where the solubility constant  $K_0$  is as reported by Weiss (1974) :

$$p\text{CO}_2 = \frac{\text{CO}_2(\text{aq})}{K_0}$$

**Equation 5**  $\text{CO}_2$  conversion to  $p\text{CO}_2$  using Henry's Law is respective to  $K_0$  (Weiss, 1974)

The data used for all these calculations are presented in following Table 2.

#### 4. Environmental Implications and $p\text{CO}_2$ reconstruction

All biomarkers record a large positive carbon isotope excursion in OAE 2 sediments. Although the limited number of OAE 2 samples we measured dictates caution, the magnitude of that shift ranges from about 2 to 7 ‰. This is larger than that inferred for the ocean-atmosphere CIE, which is thought to be 2 ‰ (Jarvis et al., 2011) but similar to the range observed at the Cape Verde Basin across OAE 2 (Sinninghe Damsté et al., 2008). This difference yields a decrease in photosynthetic carbon isotope discrimination ( $\epsilon_p$ ) during OAE 2. This has been attributed previously to a  $p\text{CO}_2$  decline due to chemical weathering and organic carbon burial feedbacks and/or increased productivity (Sinninghe Damsté et al., 2008; Arthur et al., 1988). Our results are consistent with those interpretations. We do not focus on the MCE, which is evident in the TOC  $\delta^{13}\text{C}$  data but not in the lower resolution biomarker data. Instead, we focus on the long-term Cenomanian data.

Bulk organic matter  $\delta^{13}\text{C}$  data from previous work and our own (Figure 3A) are consistent with the compilation of inorganic  $\delta^{13}\text{C}$  records described by Joo et al. (2020), all recording a subtle long-term increase from the middle to late Cenomanian (95.5 to 93.9 Ma). This increase also appears to be recorded in putative photoautotroph biomarkers at Demerara Rise such as phytane that has been used to reconstruct ancient  $p\text{CO}_2$ , including during the Cretaceous (Witkowski et al., 2018; Naafs et al., 2016), with greater discrimination during photosynthesis (or a larger difference between inorganic and organic carbon  $\delta^{13}\text{C}$ ) indicating higher  $\text{CO}_2$  concentrations or lower algal growth rates (Freeman and Hayes, 1992). Phytane, derived from chlorophyll, can have terrestrial sources, but that is unlikely in this setting, given the low BIT indices. Although we have not determined site-specific inorganic (carbonate)  $\delta^{13}\text{C}$  values in 1258 sediments due to the low abundance of carbonate and high TOC contents, the similar trends in phytane  $\delta^{13}\text{C}$  and globally widespread carbonate  $\delta^{13}\text{C}$  values suggest a minimal change in carbon isotope discrimination ( $\epsilon_p$ ). By extension, this suggests no long-term change in  $p\text{CO}_2$  despite a dramatic increase in  $\text{TEX}_{86}$ -derived SSTs.

Potentially, this is due to the very high Cenomanian  $p\text{CO}_2$ . At very high  $p\text{CO}_2$  levels,  $\epsilon_p$  values reach their maximum values dictated by the fractionation associated with the Rubisco enzyme (Pancost et al., 2013; SI Fig.1). This would also explain why phytane  $\delta^{13}\text{C}$  values appear not to vary with changes in biomarker ecological or productivity proxies, which also exert a strong control on  $\epsilon_p$  (Bidigare et al., 1997). Consistent with this, phytane  $\delta^{13}\text{C}$  values are very low in the Cenomanian, among the lowest observed for the Phanerozoic (Witkowski et al., 2018) and perhaps reaching the limits of photosynthetic isotopic fractionation ( $\epsilon_p$ ) under higher  $p\text{CO}_2$  conditions (Pancost et al., 2013). However, at other sites, especially those in the North American Western Interior Seaway (Joo and Sageman, 2014), TOC  $\delta^{13}\text{C}$  values decrease during the Cenomanian, which Joo et al. (2020) attribute to an increase in  $\epsilon_p$  driven by an increase in  $p\text{CO}_2$ . Such an interpretation is consistent with increasing SSTs observed at Demerara Rise and elsewhere.

There are several possible explanations for the differences between Demerara Rise and WIS long-term organic  $\delta^{13}\text{C}$  records. First, there could be different local long-term trends in inorganic carbon (which had not been determined for either location). Changes in ocean circulation (e.g., upwelling) can result in local or regional trends that overprint the global changes in ocean-atmosphere  $\delta^{13}\text{C}$  values. Second, at high growth rates or cell sizes,  $\epsilon_p$  is more sensitive to  $p\text{CO}_2$  change (Popp et al., 1998; S.I Fig.1); however, Demerara Rise is thought to be a high productivity site, which would make it more rather than less sensitive. Third, increased TOC contents and increasingly reducing conditions at Demerara Rise (Figure 3) could have been partially caused by an increase in algal growth rates. Such an increase would cause  $\epsilon_p$  to decrease, potentially offsetting

an increase in  $\epsilon_p$  due to higher  $p\text{CO}_2$ . Regardless of the mechanism, the very low phytane  $\delta^{13}\text{C}$  values and insensitivity to a presumed  $p\text{CO}_2$  increase are consistent with very high Cenomanian  $p\text{CO}_2$  levels. Both high and rising  $p\text{CO}_2$  values are likely driven by extensive volcanism during the late Cenomanian, as argued by Joo et al. (2020) and references therein.

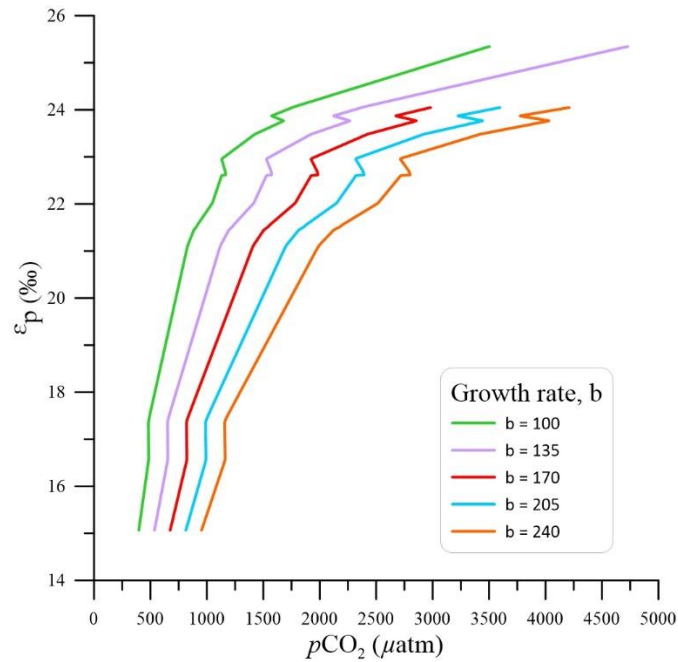

**Figure S1: Relationship of sensitivity between  $\epsilon_p$  (‰) value and  $p\text{CO}_2$  ( $\mu\text{atm}$ ) of Demerara Rise, with varying growth size ( $b$ ). The curve represents different values of  $b$  (factors that influence the isotopic fractionation, including growth rate and cell geometry); of 100, 135, 170, 205 and 240  $\% \text{ kg } \mu\text{M}^{-1}$ , from left to right (Pancost et al., 2013).**

Despite these many caveats, we can attempt to reconstruct  $p\text{CO}_2$  from  $\epsilon_p$  values derived from phytane  $\delta^{13}\text{C}$  by assuming planktonic foraminifera  $\delta^{13}\text{C}$  values of 1 ‰ (Bice and Norris, 2005) and using a biosynthetic correction factor from phytane to primary photosynthate of 3.5 ‰ (Witkowski et al., 2018). Using these assumptions,  $\epsilon_p$  values range between 15 to 25.3 ‰, with the lowest fractionation during OAE 2 indicating low  $p\text{CO}_2$  concentration. For the Cenomanian, this approach produces  $p\text{CO}_2$  ranging from 670 to 6000 ppm (see above methods). Because the highest values of phytane-derived  $\epsilon_p$  approach the nominal 26.5 ‰ maximum associated with Rubisco (Witkowski et al., 2018), these are likely underestimates of  $p\text{CO}_2$ . However, at such  $\epsilon_p$  values, our  $p\text{CO}_2$  estimates are also very sensitive to minor changes in  $\delta^{13}\text{C}$  phytane. We also note that in a comparable study from Cape Verde Site 367,  $\delta^{13}\text{C}$  values of free phytane are lower than those of S-bound phytane (Sinninghe Damsté et al., 2008), such that our estimates based solely on the former could overestimate the  $p\text{CO}_2$ .

**Table S3: Carbon dioxide concentration ( $p\text{CO}_2$ ) estimate from  $\delta^{13}\text{C}$  (‰, VPDB) of phytane.**

| Age   | MCD    | SST (°C) | SST (K) | $\delta^{13}\text{C}$ (Phytane) | $\Delta\delta$ | $\delta_p$ | $\delta_a$ | $\epsilon b(a)$ | $\delta d$ | $\epsilon_p$ | $\epsilon_f$ | $b$ | CO2   | Salinity | KO      | $p\text{CO}_2$ |
|-------|--------|----------|---------|---------------------------------|----------------|------------|------------|-----------------|------------|--------------|--------------|-----|-------|----------|---------|----------------|
| 93.54 | 422.89 | 35.7     | 308.9   | -28.2                           | 3.5            | -24.7      | 1.0        | -7.8            | -7.8       | 17.3         | 26.5         | 170 | 18.6  | 35.33    | 0.02265 | 820            |
| 93.55 | 423.00 | 40.0     | 313.1   | -27.1                           | 3.5            | -23.6      | 1.0        | -7.4            | -7.4       | 16.6         | 26.5         | 170 | 17.1  | 35.33    | 0.02081 | 823            |
| 93.85 | 426.58 | 37.0     | 310.1   | -25.9                           | 3.5            | -22.4      | 1.0        | -7.7            | -7.7       | 15.1         | 26.5         | 170 | 14.9  | 35.33    | 0.02206 | 674            |
| 94.01 | 428.46 | 35.7     | 308.9   | -33.3                           | 3.5            | -29.8      | 1.0        | -7.8            | -7.8       | 22.7         | 26.5         | 170 | 44.7  | 35.33    | 0.02264 | 1976           |
| 94.08 | 429.32 | 37.6     | 310.7   | -34.2                           | 3.5            | -30.7      | 1.0        | -7.6            | -7.6       | 23.8         | 26.5         | 170 | 62.2  | 35.33    | 0.02180 | 2854           |
| 94.22 | 431.08 | 36.3     | 309.5   | -32.1                           | 3.5            | -28.6      | 1.0        | -7.8            | -7.8       | 21.4         | 26.5         | 170 | 33.6  | 35.33    | 0.02236 | 1504           |
| 94.29 | 432.03 | 38.8     | 311.9   | -32.4                           | 3.5            | -28.9      | 1.0        | -7.5            | -7.5       | 22.0         | 26.5         | 170 | 37.9  | 35.33    | 0.02129 | 1782           |
| 94.44 | 434.09 | 36.9     | 310.1   | -32.1                           | 3.5            | -28.6      | 1.0        | -7.7            | -7.7       | 21.5         | 26.5         | 170 | 34.1  | 35.33    | 0.02210 | 1544           |
| 94.58 | 435.84 | 36.3     | 309.5   | -31.8                           | 3.5            | -28.3      | 1.0        | -7.8            | -7.8       | 21.1         | 26.5         | 170 | 31.7  | 35.33    | 0.02236 | 1418           |
| 94.80 | 438.85 | 35.7     | 308.9   | -33.3                           | 3.5            | -29.8      | 1.0        | -7.8            | -7.8       | 22.6         | 26.5         | 170 | 43.6  | 35.33    | 0.02265 | 1927           |
| 94.85 | 439.45 | 32.6     | 304.9   | -36.3                           | 3.5            | -32.8      | 1.0        | -8.2            | -8.2       | 25.3         | 26.5         | 170 | 146.9 | 35.33    | 0.02467 | 5955           |
| 94.91 | 440.32 | 37.0     | 310.1   | -33.1                           | 3.5            | -29.6      | 1.0        | -7.7            | -7.7       | 22.6         | 26.5         | 170 | 43.8  | 35.33    | 0.02208 | 1984           |
| 95.02 | 441.86 | 31.4     | 304.5   | -34.0                           | 3.5            | -30.5      | 1.0        | -8.3            | -8.3       | 22.9         | 26.5         | 170 | 47.8  | 35.33    | 0.02488 | 1923           |
| 95.30 | 445.47 | 34.5     | 307.7   | -34.7                           | 3.5            | -31.2      | 1.0        | -7.9            | -7.9       | 24.0         | 26.5         | 170 | 69.3  | 35.33    | 0.02323 | 2982           |
| 95.35 | 446.28 | 37.0     | 310.1   | -32.1                           | 3.5            | -28.6      | 1.0        | -7.7            | -7.7       | 21.6         | 26.5         | 170 | 34.4  | 35.33    | 0.02206 | 1557           |
| 95.81 | 452.35 | 32.7     | 305.8   | -34.8                           | 3.5            | -31.3      | 1.0        | -8.1            | -8.1       | 23.9         | 26.5         | 170 | 64.6  | 35.33    | 0.02417 | 2674           |
| 96.64 | 463.46 | 34.5     | 307.6   | -34.2                           | 3.5            | -30.7      | 1.0        | -7.9            | -7.9       | 23.5         | 26.5         | 170 | 56.3  | 35.33    | 0.02324 | 2423           |
